# Supplementary material for: Genome-wide association study of thyroid-stimulating hormone highlights new genes, pathways and associations with thyroid disease
Source: Springer Nature journal article supplement (doi:10.1038/s41467-023-42284-5), 2023-10-23
Supplement: MOESM3 [file 41467_2023_42284_MOESM3_ESM.pdf]

## **Description of Additional Supplementary Files**

**Supplementary Data 1:** Participant demographics across the five studies contributing to the meta-analysis of stages 1 and 2

**Supplementary Data 2:** Results for Stage 1 and resulting sentinel variant selection, Stage 2, and meta-analysis of Stages 1 and 2.

**Supplementary Data 3:** Prioritised genes

**Supplementary Data 4:** Previously reported genes

**Supplementary Data 5:** Epidemiological associations

**Supplementary Data 6:** Single-variant PheWAS associations

**Supplementary Data 7:** Variants selected at each gene for look up of epidemiological associations

**Supplementary Data 8:** Druggability

**Supplementary Data 9:** ConsensuspathDB results

**Supplementary Data 10:** Pathway-based PheWAS results

**Supplementary Data 11:** TSH polygenic risk score PheWAS results

**Supplementary Data 12:** Association results of TSH and free T4 with TSH PGS in ancestry groups in UK Biobank

**Supplementary Data 13:** Association results of diseases with TSH PGS in ancestry groups in UK Biobank

**Supplementary Data 14:** Association results of diseases with TSH PGS in ancestry groups in UK Biobank (winner's curse free)

**Supplementary Data 15:** 95% credible sets

**Supplementary Data 16:** Clinical codes used to define thyroid-stimulating hormone (TSH), free T4, hypo- and hyperthyroidism, other thyroid diseases, and thyroid cancer

**Supplementary Data 17:** 95% credible sets

**Supplementary Data 18:** FUMA eQTL look up results

**Supplementary Data 19:** Polygenic Priority Score (PoPS) results - 500KB window

**Supplementary Data 20:** Genes near our signals associated with rare Mendelian respiratory diseases

**Supplementary Data 21:** Mouse ortholog genes near our signals associated with a respiratory disease

**Supplementary Data 22:** Look up of UK Biobank WES variants

**Supplementary Data 23:** Putative causal variants
